# Supplementary material for: Keggin polyoxoanion supported organic–inorganic trinuclear lutetium cluster, {Na(H2O)3[Lu(pydc)(H2O)3]3}[SiW12O40]·26.5H2O
Source: Royal Society of Chemistry journal article supplement (doi:10.1039/c2dt30517h), 2012-01-01
Supplement: c2dt30517h.pdf [file c2dt30517h.pdf]

# Supplementary Information

## Keggin polyoxoanion supported organic-inorganic trinuclear lutetium cluster, $\{\text{Na}(\text{H}_2\text{O})_3[\text{Lu}(\text{pydc})(\text{H}_2\text{O})_3]_3\}[\text{SiW}_{12}\text{O}_{40}]\cdot 26.5\text{H}_2\text{O}$

Suzhi Li,<sup>a,b</sup> Dongdi Zhang,<sup>a</sup> Yuan yuan Guo,<sup>a</sup> Pengtao Ma,<sup>a</sup> Xiaoyang Qiu,<sup>b</sup> Jingping Wang,<sup>\*a</sup> and Jingyang Niu<sup>\*a</sup>

<sup>a</sup>*Institute of Molecular and Crystal Engineering, College of Chemistry and Chemical Engineering, Henan University, Kaifeng, Henan 475004, P. R. China. Fax: (+86) 378-3886876; Tel: (+86) 378-3886876; E-mail: jpwang@henu.edu.cn; jyniu@henu.edu.cn*

<sup>b</sup>*Department of Chemistry, Shangqiu Normal University, Shangqiu Henan 476000, P. R. China.*

**Fig. S1** The IR spectra of **1**,  $\text{H}_4[\text{SiW}_{12}\text{O}_{40}]\cdot n\text{H}_2\text{O}$  and  $\text{H}_2\text{pydc}$  ligands.

**Fig. S2** The UV spectra of **1**,  $\text{H}_4[\text{SiW}_{12}\text{O}_{40}]\cdot n\text{H}_2\text{O}$  and  $\text{H}_2\text{pydc}$  ligands.

**Fig. S3** The TG/DTA curve of **1**.

**Fig. S4** Comparison of the simulated and experimental PXRD patterns of **1**.

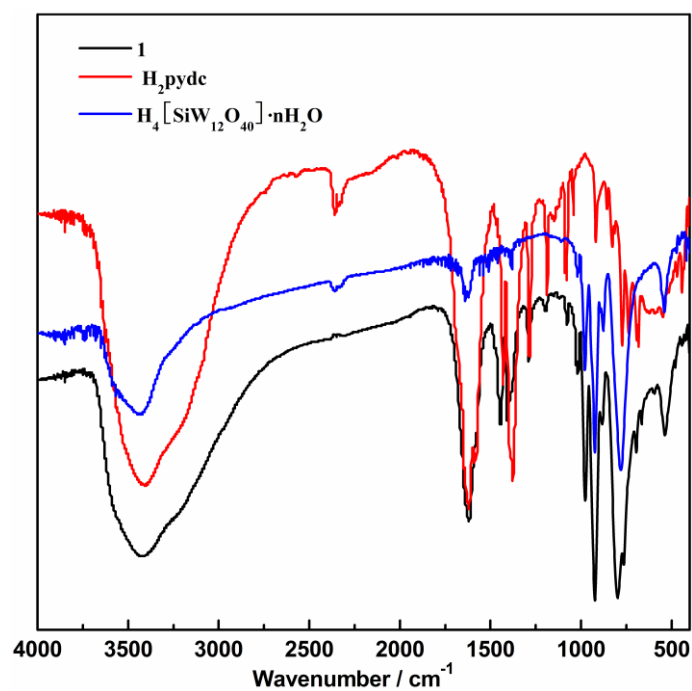

**Fig. S1** The IR spectra of **1**, H<sub>4</sub>[SiW<sub>12</sub>O<sub>40</sub>]·nH<sub>2</sub>O and H<sub>2</sub>pydc ligands.

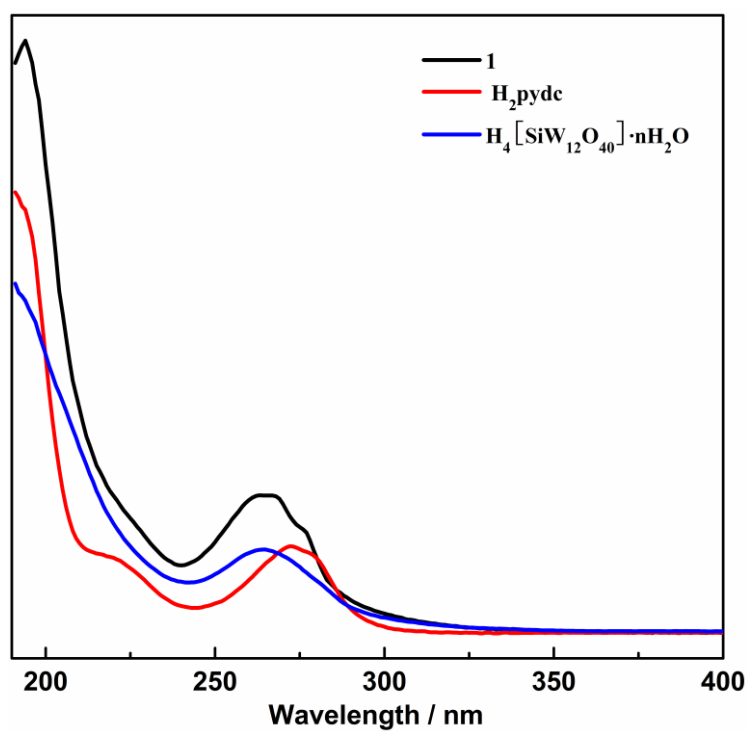

**Fig. S2** The UV spectra of **1**, H<sub>4</sub>[SiW<sub>12</sub>O<sub>40</sub>]·nH<sub>2</sub>O and H<sub>2</sub>pydc ligands.

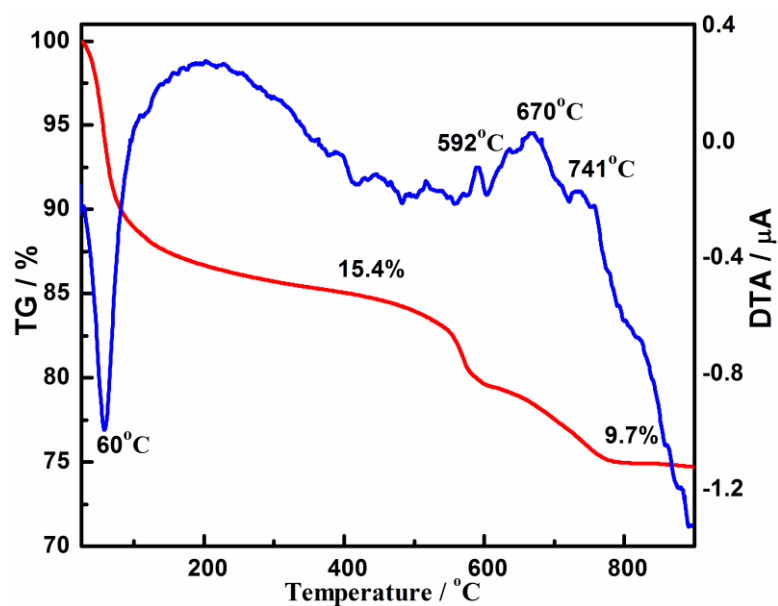

**Fig. S3** The TG/DTA curve of **1**.

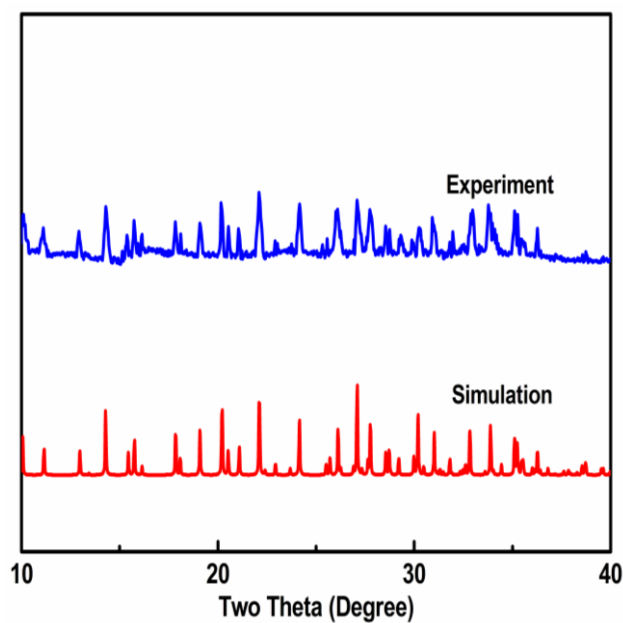

**Fig. S4** Comparison of the simulated and experimental PXRD patterns of **1**.

The experimental PXRD pattern of the bulk product of **1** is in good agreement with the simulated PXRD pattern, confirming the phase purity of the sample (Fig. S4). The difference in intensity between them is attributed to the variation in preferred orientation of the powder sample during collection of the experimental PXRD.
